## ASPECTS OF IONIC TRANSPORT MECHANISMS IN CRAYFISH *ASTACUS LEPTODACTYLUS*

By J. EHRENFELD

*Laboratoire de Physiologie Cellulaire Faculté des Sciences de l'Université  
de Nice 06, Nice, France*

(Received 15 November 1973)

### SUMMARY

1. During the uptake of chloride from an external choline chloride solution, electroneutrality appears to be preserved by excretion of base, but base excretion independent of chloride absorption also occurs.
2. Sodium ion uptake from sodium sulphate solutions is compensated by excretion of hydrogen ions, but this has been established only in animals adapted to distilled water.
3. In animals preadapted to running water, the sodium ion influx can be abolished almost totally by amiloride without diminishing ammonium excretion.
4. The net fluxes of sodium and chloride are inhibited by acetazolamide and cyanide.
5. These results are interpreted as indicating that  $\text{Na}^+$  and  $\text{Cl}^-$  are absorbed chiefly in exchange for  $\text{H}^+$  and  $\text{HCO}_3^-$ , and are discussed in relation to an exchange diffusion mechanism.

### INTRODUCTION

Crayfish can absorb  $\text{Na}^+$  and  $\text{Cl}^-$  from dilute solutions, principally through the gills (Krogh, 1939; Koch, Evans & Schicks, 1954; Bryan, 1960*b*; Shaw, 1960*a, b*; Bielawski, 1964). Krogh found that the amounts of sodium and chloride absorbed were not necessarily equal. In experiments where the accompanying ion was impermeant it was possible to deduce that an endogenous ion of the same charge as that absorbed must be released in order to preserve electroneutrality.

Krogh suggested that the ion exchanged for  $\text{Na}^+$  might be  $\text{NH}_4^+$  in ammonotelic animals such as teleosts and crustacea. This proposal has found some experimental support (Shaw, 1959, 1960*a, b*; Maetz & Garcia-Romeu, 1964). However, ammonium excretion appears to be independent of the  $\text{Na}^+$  concentration of the medium in crayfish, carp and trout (Shaw, 1960*b*; De Vooy, 1968; Kerstetter, Kirschner & Rafuse, 1970) and acetazolamide (Diamox) reduces the  $\text{Na}^+$  flux without inhibiting the release of  $\text{NH}_4^+$  (Kerstetter *et al.* 1970).

The possibility therefore arises that  $\text{H}^+$  rather than  $\text{NH}_4^+$  is exchanged for  $\text{Na}^+$  in ammonotelic animals, as in the ureotelic frogs studied by Garcia-Romeu, Salibian & Pezzami-Hernandez (1969) and by Garcia-Romeu & Ehrenfeld (1972). Maetz, however, has found that in goldfish sodium absorption is correlated with the sum of the equivalents of  $\text{H}^+$  and of  $\text{NH}_4^+$  excreted (1973).

The work cited above on frogs showed that in these animals there is an exact stoichiometry between the chloride absorbed and the excreted base, which probably consists of bicarbonate.

The present work concerns the nature of the excretion of endogenous ions in exchange for  $\text{Na}^+$  and  $\text{Cl}^-$  in the crayfish *Astacus leptodactylus leptodactylus*.

#### MATERIAL AND METHODS

The crayfish (*Astacus leptodactylus leptodactylus*), average weight 70 g were obtained from Turkey. They were kept unfed at a constant temperature ( $15 \pm 1^\circ\text{C}$ ) in tanks of running water. Before certain experiments they were preadapted for 10 days in distilled water which was renewed each day.

On the day of an experiment the animals were weighed and their nephropores blocked with dentists' cement in order to avoid contamination of the external solution by the urine. They were then placed in individual aquaria with 230 ml of the experimental solution. The temperature was maintained at  $15 \pm 1^\circ\text{C}$ . Ten ml samples were taken at the beginning and during the experiment which generally lasted 3 h. To all the experimental solutions 2.5 mM/l of Tris was added and the pH was adjusted to 7.0 with maleic acid. The pH was also controlled during the experiments.

#### Flux measurements

The netfluxes\* of sodium, chloride, ammonium, hydrogen and base were calculated from the slopes of the lines representing the variation of external ionic concentration as a function of time. The sodium concentration of the sample was measured by flame photometry with an Eppendorf photometer and the chloride concentration with an Aminco Cotlove electrometric chloride titrator. Total ammonium concentrations ( $\text{NH}_3 + \text{NH}_4^+$ ) in the external bath samples were determined with a Technicon auto-analyser (Logsdon, 1960; Assous, Dreux & Girard, 1960).

The sodium and chloride influxes ( $F_{\text{in}}$ ) were calculated from the slopes of the curves representing the disappearance of  $^{24}\text{Na}$  and  $^{36}\text{Cl}$  from the external medium as a function of time, taking into account the specific activities of the radioisotopes.

$$F_{\text{in}} = \frac{\Delta Q / \Delta t}{Q/E},$$

where  $\Delta Q / \Delta t$  is the variation of the quantity of radioactive isotope during the desired time unit and  $Q/E$  the specific radio-activity (RAS) of the ion in question (i.e. ratio of radioactive to total no. of atoms). The  $^{24}\text{Na}$  (CEN Saclay) was provided in the form of  $^{24}\text{NaHCO}_3$  and neutralized with 0.1 N-HCl. It was added to the external bath to give a final concentration of 0.2 mCi/l. The  $^{36}\text{Cl}$  (Radiochemical Centre, Amersham) was obtained from a  $\text{H}^{36}\text{Cl}$  solution neutralized with NaOH. It was added to the external medium to a concentration of 4  $\mu\text{Ci/l}$ .  $^{24}\text{Na}$  activity was counted in 2 ml of sample in a Mecaserto well-counter type MO 13/100. The  $^{36}\text{Cl}$  was counted in a Nuclear Chicago Scintillation Counter (Mark I, model 6860): 1 ml of the sample was

\* The netflux ( $F_n$ ) of an ion is considered positive when there is a net absorption of this ion by the animal, and negative when there is a loss of the ion into the external medium.

added to 10 ml of the scintillation liquid (Bray, 1960). The count of each sample was corrected for quenching by the use of a standard quenching correction curve.

The sodium and chloride effluxes ( $F_{\text{out}}$ ) were taken as the differences between the respective netfluxes and influxes.

Since the gills of the crayfish are the site of respiratory  $\text{CO}_2$  elimination, the samples had air bubbled through them for at least 30 min before any titration, in order to eliminate all volatile acidity. The hydrogen ion concentration was measured by titration with a 5 mM-NaOH solution and the base concentration with a 3 mM-HCl solution. The measurements were made on 2 ml of sample with a Radiometer TT2 automatic titrator linked to an automatic burette and a SB R 2C recorder.

All fluxes are expressed in  $\mu\text{-equiv./h/100 g}$ .

### *Measurement of the anhydrase activity of the gill*

Gills were isolated, perfused with a 9% NaCl solution, dried and weighed. They were then ground in a teflon homogenizer, and the anhydrase activity measured by a manometric technique (Maetz, 1956; Istin & Girard, 1970) and expressed in international activity units per mg protein (Maren, 1967). The protein concentration of the homogenates was obtained by the so-called Folin technique.

### *Inhibitors utilized*

Amiloride (Merck Sharp and Dohme Research Laboratory, West Point) was used at a concentration of  $5 \times 10^{-5} \text{ M}$  in the external medium. Diamox (Acetazolamide, Theraplix Laboratory) was injected to give a final concentration of  $2 \times 10^{-4} \text{ M/1000 g}$  animal. Potassium cyanide was added to the external medium to give a concentration of  $5 \times 10^{-4} \text{ M/l}$ .

## RESULTS

### *I. Chloride/base exchanges from a choline chloride solution*

Table 1 summarizes the data on chloride influxes and effluxes, and netfluxes of chloride and base for a group of 13 animals placed in a 1800  $\mu\text{-equiv./l}$  choline chloride solution buffered at pH 7.0. The chloride influx is three times the netflux. There is thus a considerable chloride efflux. The netflux for base excretion is significantly higher than the netflux for  $\text{Cl}^-$  absorption. To demonstrate any correlation which may exist these two netfluxes the data for base excretion as a function of  $\text{Cl}^-$  absorption have been plotted in Fig. 1. The regression coefficient is  $-1.21 \pm 0.15$ , which is not significantly different from 1. The ordinate value when the abscissa is 0 is  $16.6 \pm 5.1 \mu\text{-equiv./h/100 g}$ , representing a measurable base excretion which is independent of the  $\text{Cl}^-$  absorption. The excess of base excretion above this value bears a 1:1 relation to the chloride absorption.

### *II. Sodium/hydrogen exchanges from a $\text{Na}_2\text{SO}_4$ solution*

To demonstrate the  $\text{Na}^+$ /endogenous ion exchange mechanism experimentally, the  $\text{Na}^+$ ,  $\text{H}^+$  and ammonium netfluxes were measured when the  $\text{Na}^+$  was being absorbed from a  $\text{Na}_2\text{SO}_4$  solution buffered at pH 7.0, the  $\text{SO}_4$  ion being impermeant.

To check that the sulphate ion is truly impermeant the concentration of labelled

Table 1. Chloride absorption and base excretion in *Astacus leptodactylus*

(Crayfishes preadapted to running water. Fluxes measured in a buffered choline chloride solution (1800  $\mu$ -equiv./l) of pH 7.0. Fluxes expressed as  $\mu$ -equiv./h/100 g (mean  $\pm$  standard deviation of the mean).)

| $F_{in} Cl^-$   | $F_{out} Cl^-$ | $F_n Cl^-$      | $F_n \text{ base}$ |
|-----------------|----------------|-----------------|--------------------|
| $147.8 \pm 4.8$ | $94.7 \pm 4.5$ | $+53.1 \pm 2.8$ | $-80.8 \pm 4.9$    |
| (n = 13)        | (n = 13)       | (n = 13)        | (n = 13)           |

$F_{in} Cl^-$ ,  $F_{out} Cl^-$ ,  $F_n Cl^-$  = influx, efflux and netflux of chloride.  
 $F_n \text{ base}$  = netflux of base.  
Number of animals in parentheses.

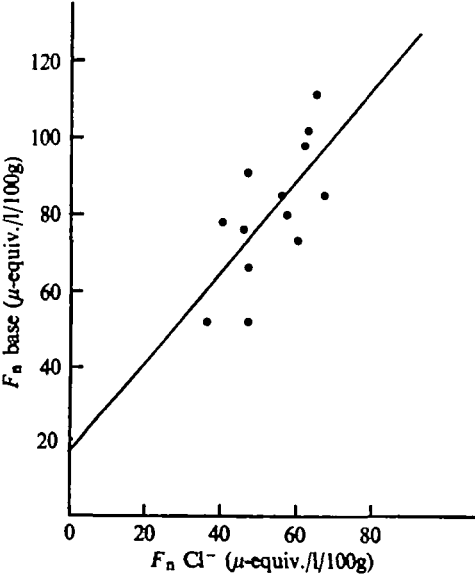

Fig. 1. Transepithelial netflux of chloride as a function of base excretion in *Astacus lactodactylus* *in vivo*. Animals were pre-adapted in running water. Fluxes are measured in a choline chloride solution (1800  $\mu$ -equiv./l) buffered to pH 7.0.  $F_n \text{ base} = 1.21$ ,  $F_n Cl^- = 16.60$ .

sulphate in the external medium was controlled throughout an experiment (4 h) and found to remain unchanged.

Table 2 A (control period) summarizes results from a group of nine animals previously adapted to distilled water. It shows that the  $Na^+$  netflux is slightly higher than the  $H^+$  excretory netflux, and the excretory ammonium netflux is half that of the  $Na^+$  netflux. No correlation between  $Na^+$  absorption and ammonium excretion could be seen, but on the other hand, there was a good correlation between the  $Na^+$  and  $H^+$  netfluxes, as can be seen in Fig. 2. The slope of the regression line is  $-1.24 \pm 0.13$  which is not significantly different from 1. The ordinate value when the abscissa is 0 is  $-12.56 \mu$ -equiv./h/100 g indicating that a measurable base excretion occurs even in the absence of a  $Na^+$  netflux. Table 2 B summarizes the data from the group of 6 animals adapted in running water. A comparison of Table 2 A and B shows that preadaptation to distilled water causes a slight increase of the  $Na^+$  influx, while the  $Na^+$  efflux is higher in a running-water adapted animal than in a distilled-water

Table 2. Effect of Amiloride on the sodium absorption, acid excretion and ammonium excretion in *A. leptodactylus*

A, Crayfishes preadapted to distilled water for a week.  
 B, Crayfishes preadapted to running water.  
 (Fluxes measured in a  $\text{Na}_2\text{SO}_4$  (1800  $\mu$ -equiv./l) solution buffered at pH 7.0. Amiloride added to the external bath (final concentration  $5 \times 10^{-5}$  M). Fluxes expressed as  $\mu$ -equiv./h/100 g (mean  $\pm$  standard deviation of the mean).)

|                | $F_{\text{in}} \text{Na}^+$ | $F_{\text{out}} \text{Na}^+$ | $F_{\text{n}} \text{Na}^+$ | $F_{\text{n}} \text{H}^+$ | $F_{\text{n}} \text{ammonium}$ |
|----------------|-----------------------------|------------------------------|----------------------------|---------------------------|--------------------------------|
| A ( $n = 9$ )  |                             |                              |                            |                           |                                |
| Control period | $43.3 \pm 3.2$              | $13.6 \pm 2.2$               | $+29.7 \pm 3.4$            | $-22.1 \pm 4.7$           | $-14.0 \pm 2.7$                |
| Amiloride      | $0.7 \pm 0.5$               | $10.5 \pm 1.1$               | $-9.9 \pm 1.0$             | $+13.2 \pm 3.1$           | $-8.2 \pm 1.8$                 |
| Difference*    | $-42.6 \pm 3.3$             | $-3.1 \pm 2.5$               | $-39.6 \pm 2.9$            | $+35.3 \pm 4.0$           | $-5.8 \pm 1.5$                 |
|                | $P < 0.001$                 |                              | $P < 0.001$                | $P < 0.001$               | $P < 0.01$                     |
| B ( $n = 6$ )  |                             |                              |                            |                           |                                |
| Control period | $36.4 \pm 5.2$              | $21.1 \pm 4.2$               | $+15.3 \pm 2.3$            | $+20.1 \pm 4.6$           | $-6.7 \pm 1.4$                 |
| Amiloride      | $0.9 \pm 0.6$               | $22.1 \pm 3.1$               | $-21.2 \pm 3.3$            | $+32.3 \pm 4.8$           | $-5.5 \pm 1.1$                 |
| Difference*    | $-35.5 \pm 4.9$             | $+1.0 \pm 3.3$               | $-36.5 \pm 3.4$            | $+12.2 \pm 6.2$           | $-1.2 \pm 1.7$                 |
|                | $P < 0.001$                 |                              | $P < 0.001$                | $P < 0.1$                 |                                |

$F_{\text{in}} \text{Na}^+$ ,  $F_{\text{out}} \text{Na}^+$ ,  $F_{\text{n}} \text{Na}^+$  = influx, efflux and netflux of sodium.

$F_{\text{n}} \text{H}^+$ ,  $F_{\text{n}} \text{ammonium}$  = netflux of  $\text{H}^+$  and ammonium.

Number of animals in parentheses.

\* Mean of the difference between paired data  $\pm$  S.E.M.

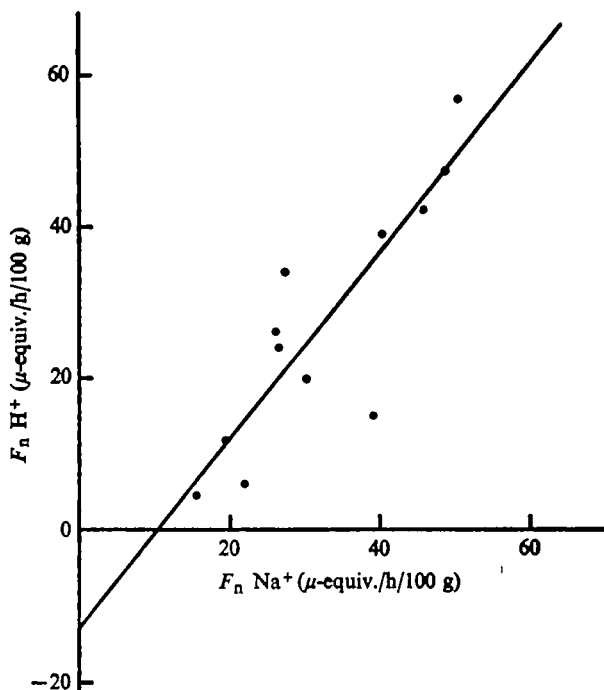

Fig. 2. Transepithelial netfluxes of  $\text{Na}^+$  as a function of acid excretion in *Astacus leptodactylus* *in vivo*. Animals were preadapted in distilled water. Fluxes are measured in a  $\text{Na}_2\text{SO}_4$  solution (1800  $\mu$ -equiv./l) buffered to pH 7.0.  $F_{\text{n}} \text{H}^+ = 1.24$ ,  $F_{\text{n}} \text{Na}^+ = 12.56$ .

adapted one. The excretory ammonium flux was  $-6.7 \pm 1.4 \mu\text{-equiv./h/100 g}$ , which is half that of the distilled water-adapted animal. The data in Table 2B obtained by titration of the external medium would appear to contradict the data of Table 2A. Thus for animals adapted in running water ( $\text{Na}^+$  netflux relatively low) there is no increase of the  $\text{H}^+$  concentration in the external medium but rather a reduction. Figs. 1 and 2 reveal the presence of a considerable base excretion into the external medium independent of the  $\text{Na}^+$  or  $\text{Cl}^-$  netfluxes. It is to be expected therefore that this titrable base neutralizes the  $\text{H}^+$  excreted in relation to  $\text{Na}^+$  transport and thus masks the  $\text{Na}^+/\text{H}^+$  exchange mechanism. The use of an inhibitor specific for  $\text{Na}^+$ , which also blocks the  $\text{Na}^+/\text{H}^+$  exchange mechanism (Kirschner, 1973; Garcia-Romeu & Ehrenfeld, unpublished data) affords additional proof of the existence of this exchange mechanism in variously preadapted crayfish.

### III. Action of Amiloride

Table 2 shows that at a concentration of  $5 \times 10^{-6} \text{ M}$  amiloride inhibits the  $\text{Na}^+$  influx almost completely (99 %). The  $\text{Na}^+$  netflux becomes strongly negative, its value approaching that of the efflux which remains unchanged. In distilled water adapted animals amiloride totally inhibited hydrogen excretion: the  $\text{H}^+$  netflux which had been at  $-22.1 \mu\text{-equiv./h/100 g}$  became  $+13.2 \mu\text{-equiv./h/100 g}$ : a change of  $+35.3 \mu\text{-equiv./h/100 g}$ . This value is in good agreement with the  $\text{Na}^+$  netflux in the control period ( $+29.7 \mu\text{-equiv./h/100 g}$ ). It should be noted that when amiloride blocks all sodium transport the  $\text{H}^+$  excretory netflux of  $13.2 \mu\text{-equiv./h/100 g}$  is equivalent to the value of titrable base in the external medium: this base excretion in the absence of sodium net absorption has already been discussed (Fig. 2). With running water adapted animals the  $\text{Na}^+$  netfluxes were less important than those of distilled water adapted individuals and thus the  $\text{Na}^+/\text{H}^+$  exchange would be more likely to be masked by the titrable base excretion. The difference between the netfluxes of base excretion during the control period and after addition of amiloride, however, provides a value for the quantity of  $\text{H}^+$  excreted which can be compared with the quantity of  $\text{Na}^+$  absorbed during the control period. Table 2B shows that this difference of  $+12.2 \mu\text{-equiv./h/100 g}$  agrees well with the  $+15.3 \mu\text{-equiv./h/100 g}$  value of the netflux for sodium absorption.

A fact which must be noted is that the inhibitor also causes 40 % inhibition of the ammonium excretion in distilled water adapted animals.

### IV. Action of Diamox

Diamox, well known as an inhibitor of carbonic anhydrase has an inhibitory action not only on  $\text{Na}^+$  and  $\text{Cl}^-$  transports but also on the excretion of endogenous ions (Garcia-Romeu *et al.* 1972; Garcia-Romeu & Ehrenfeld, unpublished data). The action of this inhibitor was first tested in relation to the absorption of  $\text{Na}^+$  and  $\text{Cl}^-$  from an  $\text{NaCl}$  solution buffered at pH 7.0. Table 3 shows that intraperitoneal injection of Diamox ( $2 \times 10^{-4} \text{ M}$ ) strongly inhibits the netfluxes of  $\text{Na}^+$  and  $\text{Cl}^-$  which become negative. The parallel inhibition of the two netfluxes suggested that the agent had the same action on the unidirectional fluxes of the two ions, but a study of Table 3 shows that this is not the case: the two transport mechanisms are independently affected. While the inhibition of the  $\text{Na}^+$  netflux is due to a considerable reduction of the influx

Table 3. Effect of injection of Diamox ( $2 \times 10^{-4}$  M) on the sodium and chloride fluxes of *Astacus leptodactylus*

(Crayfishes preadapted to running water. Fluxes measured in a NaCl solution (1800  $\mu$ -equiv./l) buffered at pH 7.0. Fluxes expressed as  $\mu$ -equiv./h/100 g (mean  $\pm$  standard deviation of the mean).)

|                | $F_{in}$         | $F_{out}$         | $F_n$           |
|----------------|------------------|-------------------|-----------------|
| Na ( $n = 7$ ) |                  |                   |                 |
| Control period | $67.8 \pm 6.5$   | $21.7 \pm 2.8$    | $+46.1 \pm 7.6$ |
| Diamox         | $19.6 \pm 1.4$   | $28.7 \pm 3.1$    | $-9.1 \pm 3.0$  |
| Difference*    | $-48.2 \pm 5.7$  | $+7.0 \pm 3.0$    | $-55.2 \pm 8.2$ |
|                | $P < 0.001$      |                   | $P < 0.001$     |
| Cl ( $n = 7$ ) |                  |                   |                 |
| Control period | $161.8 \pm 6.9$  | $103.0 \pm 8.9$   | $+58.9 \pm 6.9$ |
| Diamox         | $202.1 \pm 19.6$ | $212.4 \pm 19.4$  | $-10.3 \pm 3.6$ |
| Difference*    | $+40.3 \pm 15.7$ | $+109.4 \pm 19.6$ | $-69.2 \pm 6.4$ |
|                | $P < 0.05$       | $P < 0.01$        | $P < 0.001$     |

$F_{in}$ ,  $F_{out}$ ,  $F_n$  = influx, efflux and netflux.

Number of animals in parentheses.

\* Mean of the difference between paired data  $\pm$  S.E.M.

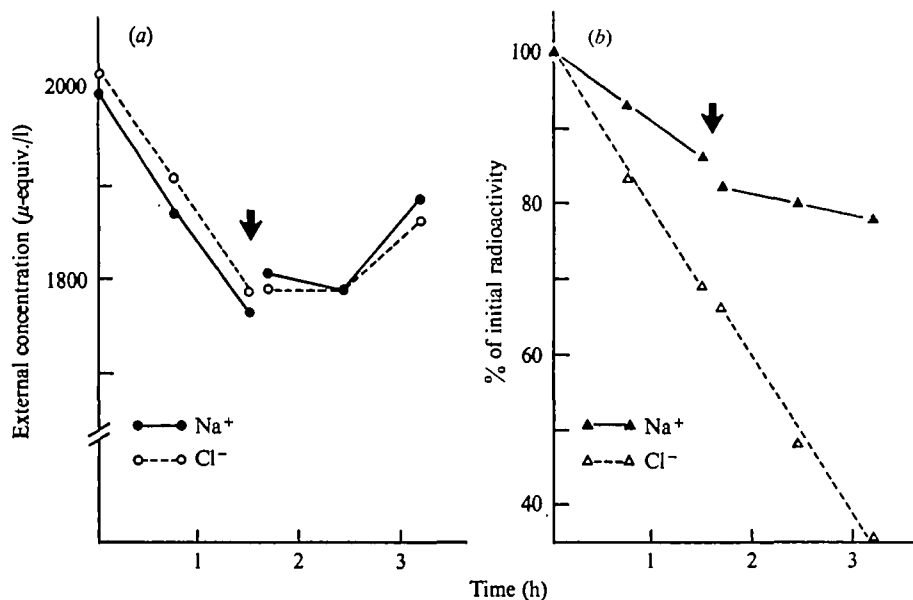

Fig. 3. Effect of injection of Diamox ( $2 \times 10^{-4}$  M) on the Na<sup>+</sup> and Cl<sup>-</sup> fluxes of *Astacus leptodactylus*: Fluxes are measured on the same animal in a NaCl solution (1800  $\mu$ -equiv./l) buffered to pH 7.0. The arrows indicate the injection of the inhibitor. (a) Netfluxes of sodium and chloride plotted against time. (b) Influxes of Na<sup>+</sup> and Cl<sup>-</sup> plotted against time.

(71 % inhibition), that of the Cl<sup>-</sup> netflux is caused by an increase of the Cl<sup>-</sup> efflux (200 %), the influx increasing slightly. Fig. 3 illustrates an individual experiment.

When Na<sup>+</sup> uptake is from a sodium sulphate solution (1800  $\mu$ -equiv.; pH 7.0) Diamox simultaneously inhibited both Na<sup>+</sup> and H<sup>+</sup> netfluxes (see Table 4A). The Na<sup>+</sup> netflux became negative owing to a 82 % inhibition of the influx. Table 4 also shows that the NH<sub>4</sub><sup>+</sup> netfluxes were strongly inhibited by Diamox.

Table 4. *Effect of injection of Diamox ( $2 \times 10^{-4}$  M) on the sodium and chloride fluxes and ammonium excretion of Astacus leptodactylus*

A, Animals preadapted in distilled water. Sodium fluxes measured in  $\text{Na}_2\text{SO}_4$  solution (1800  $\mu$ -equiv./l) buffered to pH 7.0.

B, Animals preadapted in running water. Chloride fluxes measured in choline chloride solution (1800  $\mu$ -equiv./l) buffered to pH 7.0.

(Fluxes expressed as  $\mu$ -equiv./h/100 g (mean  $\pm$  standard deviation of the mean).)

| A ( $n = 5$ )  | $F_{\text{in}} \text{Na}^+$ | $F_{\text{out}} \text{Na}^+$ | $F_{\text{n}} \text{Na}^+$ | $F_{\text{n}} \text{H}^+$  | $F_{\text{n}} \text{ammonium}$ |
|----------------|-----------------------------|------------------------------|----------------------------|----------------------------|--------------------------------|
| Control period | $73.4 \pm 10.3$             | $20.6 \pm 2.7$               | $+52.8 \pm 8.5$            | $-61.2 \pm 6.6$            | $-18.9 \pm 1.4$                |
| Diamox         | $12.7 \pm 1.3$              | $37.4 \pm 14.5$              | $-24.7 \pm 15.2$           | $+5.9 \pm 4.2$             | $-4.5 \pm 0.6$                 |
| Difference*    | $-60.7 \pm 9.5$             | $+16.8 \pm 15.4$             | $-77.5 \pm 18.2$           | $-67.1 \pm 7.3$            | $-14.4 \pm 1.6$                |
|                | $P < 0.01$                  |                              | $P < 0.02$                 | $P < 0.001$                | $P < 0.001$                    |
| B ( $n = 5$ )  | $F_{\text{in}} \text{Cl}^-$ | $F_{\text{out}} \text{Cl}^-$ | $F_{\text{n}} \text{Cl}^-$ | $F_{\text{n}} \text{base}$ | $F_{\text{n}} \text{ammonium}$ |
| Control period | $137.1 \pm 6.7$             | $87.0 \pm 7.1$               | $\pm 50.1 \pm 5.2$         | $-79.6 \pm 8.0$            | $-4.1 \pm 0.4$                 |
| Diamox         | $205.6 \pm 26.1$            | $216.2 \pm 26.6$             | $-10.6 \pm 2.5$            | $-15.6 \pm 2.4$            | $-2.9 \pm 0.5$                 |
| Difference*    | $+68.5 \pm 23.8$            | $129.2 \pm 31.2$             | $-60.7 \pm 6.6$            | $-64.0 \pm 7.4$            | $-1.2 \pm 0.5$                 |
|                | $P < 0.05$                  | $P < 0.02$                   | $P < 0.001$                | $P < 0.001$                |                                |

$F_{\text{in}}$ ,  $F_{\text{out}}$ ,  $F_{\text{n}}$  = influx, efflux and netflux.

Number of animals in parentheses.

\* Mean of the difference between paired data  $\pm$  S.E.M.

Table 5. *Effect of KCN ( $5 \times 10^{-4}$  M) on  $\text{Na}^+$  and  $\text{Cl}^-$  fluxes of Astacus leptodactylus*

(Animals preadapted in running water. Fluxes measured in a chloride sodium solution (1800  $\mu$ -equiv./l) buffered to pH 7.0. KCN added to the external bath (final concentration  $5 \times 10^{-4}$  M). Fluxes expressed as  $\mu$ -equiv./h/100 g (mean  $\pm$  standard deviation of the mean).)

| $\text{Na}^+ (n = 4)$                   | $F_{\text{in}} \text{Na}^+$    | $F_{\text{out}} \text{Na}^+$ | $F_{\text{n}} \text{Na}^+$     |
|-----------------------------------------|--------------------------------|------------------------------|--------------------------------|
| Control period                          | $45.1 \pm 12.2$                | $20.4 \pm 6.3$               | $+24.7 \pm 7.8$                |
| KCN (1st period),<br>$t = 0, t = 45'$   | $12.4 \pm 1.7$                 | $28.4 \pm 7.1$               | $-16.0 \pm 7.8$                |
| KCN (2nd period),<br>$t = 45', t = 90'$ | $9.3 \pm 0.5$                  | $21.2 \pm 3.0$               | $-12.0 \pm 2.9$                |
| Difference* (control,<br>2nd period)    | $-35.8 \pm 12.0$<br>$P > 0.05$ | $+0.8 \pm 3.9$<br>NS         | $-36.7 \pm 10.2$<br>$P < 0.05$ |
| $\text{Cl}^- (n = 4)$                   | $F_{\text{in}} \text{Cl}^-$    | $F_{\text{out}} \text{Cl}^-$ | $F_{\text{n}} \text{Cl}^-$     |
| Control period                          | $138.6 \pm 4.8$                | $77.7 \pm 9.9$               | $+60.8 \pm 10.1$               |
| KCN (1st period),<br>$t = 0, t = 45'$   | $86.3 \pm 13.9$                | $67.3 \pm 16.8$              | $+19.8 \pm 7.0$                |
| KCN (2nd period),<br>$t = 45', t = 90'$ | $63.6 \pm 2.3$                 | $71.9 \pm 6.5$               | $-8.3 \pm 8.5$                 |
| Difference* (control,<br>2nd period)    | $-75.0 \pm 2.5$<br>$P < 0.001$ | $-5.8 \pm 14.6$<br>NS        | $-69.1 \pm 14.0$<br>$P < 0.02$ |

$F_{\text{in}}$ ,  $F_{\text{out}}$ ,  $F_{\text{n}}$  = influx, efflux and netflux.

Number of animals in parentheses.

\* Mean of the difference between paired data  $\pm$  S.E.M.



Table 6. *Excretion of total ammonium in different experimental conditions in Astacus leptodactylus*

A, Animals preadapted for a week in distilled water.

B, Animals preadapted in running water.

(Excretion of ammonium measured in a  $\text{Na}_2\text{SO}_4$  solution (1800  $\mu$ -equiv./l) or a choline chloride solution (1800  $\mu$ -equiv./l) both buffered to pH 7.0. Fluxes as  $\mu$ -equiv./h/100 g (mean  $\pm$  standard deviation of the mean).)

| Excretion measured in a<br>$\text{Na}_2\text{SO}_4$ solution |                           | Excretion measured in a choline<br>chloride solution |                           |
|--------------------------------------------------------------|---------------------------|------------------------------------------------------|---------------------------|
| A                                                            | B                         | A                                                    | B                         |
| $-13.8 \pm 2.0$<br>(n = 9)                                   | $-6.3 \pm 1.0$<br>(n = 8) | $-5.0 \pm 1.4$<br>(n = 6)                            | $-4.8 \pm 0.5$<br>(n = 9) |

Number of animals in parentheses.

In animals absorbing  $\text{Cl}^-$  from a dilute choline chloride solution (1800  $\mu$ -equiv.; pH 7.0) injection of Diamox inhibits  $\text{Cl}^-$  absorption and base excretion, as can be seen in Table 4B. It should, however, be noted that although the base excretion is greatly reduced (by 80 %) a certain fraction of this endogenous ion excretion continues to alkalize the external medium independently of any net  $\text{Cl}^-$  absorption. This fact is in agreement with the results discussed above in relation to Fig. 1, in which the 16.6  $\mu$ -equiv./h/100 g at the origin indicates a base excretion independent of net  $\text{Cl}^-$  absorption.

As already mentioned, the inhibition of the  $\text{Cl}^-$  net flux is the result of an increase of the  $\text{Cl}^-$  efflux, not of a reduction of the influx, which on the contrary increases significantly.

#### V. Effect of KCN on $\text{Na}^+$ and $\text{Cl}^-$ transports

The action of KCN on  $\text{Na}^+$  and  $\text{Cl}^-$  uptake from a NaCl solution (1800  $\mu$ -equiv.; pH 7.0) was studied to throw light on the nature of the ionic transport mechanisms. Table 5 gives results obtained from a group of four animals preadapted in tap water.

The  $\text{Na}^+$  and  $\text{Cl}^-$  netfluxes were strongly inhibited, becoming negative, after addition of KCN to the external medium. The effluxes of  $\text{Na}^+$  and  $\text{Cl}^-$  were not affected by the inhibitor but the  $\text{Na}^+$  influx was reduced by 79 % and the  $\text{Cl}^-$  influx by 37 %. The chloride influx and efflux values after KCN addition were not significantly different.

#### DISCUSSION

##### *Independence of the $\text{Na}^+$ and $\text{Cl}^-$ transport mechanisms. Exchange against endogenous ions*

The results show that the  $\text{Na}^+$  and  $\text{Cl}^-$  absorption mechanisms of *Astacus leptodactylus* can be completely independent (compare Tables 1 and 3). When the ion accompanying the  $\text{Na}^+$  or  $\text{Cl}^-$  in the external solution is an impermeant one (i.e.  $\text{SO}_4^{2-}$  or choline),  $\text{Na}^+$  and  $\text{Cl}^-$  must necessarily be exchanged against an endogenous ion of the same charge to maintain the electroneutrality of the solutions. Shaw (1960b) suggested that *Astacus pallipes* exchanged  $\text{Na}^+$  against the ammonium ion or hydrogen according to its metabolic activity and the level of excretion of these ions.

Table 6 summarizes the data for ammonium excretion under different experimental

conditions. In all the cases except one it can be seen that ammonium excretion is independent of preadaptation or the presence of external  $\text{Na}^+$ . Thus, irrespective of preadaptation, the  $\text{Na}^+$  netfluxes are much higher than the ammonium excretion values, and no correlation was found between  $\text{Na}^+$  absorption and  $\text{NH}_4^+$  excretion. Table 6 shows, however, that the ammonium excretion of animals adapted in distilled water and studied in sodium sulphate is twice that of animals in other experimental conditions. Part of the  $\text{NH}_4^+$  excretion of the distilled water adapted animals is inhibited by amiloride and Diamox (Table 2A and 4A). In exceptional conditions, therefore, it would seem that part of the ammonium excretion may be in exchange for  $\text{Na}^+$ , but this  $\text{Na}^+/\text{NH}_4^+$  exchange would only represent about 20% of the total net  $\text{Na}^+$  absorption in these animals.

The ratio of 1:21 between hydrogen excretion and  $\text{Na}^+$  absorption indicates a  $\text{Na}^+/\text{H}^+$  exchange mechanism with a 1 to 1 relationship. This exchange mechanism is best seen in distilled water adapted animals but more difficult to demonstrate in tap water adapted individuals where the net  $\text{Na}^+$  absorption is lower. With the titration method used here, the excretion of a titrable base ( $\text{HCO}_3^-$ ,  $\text{OH}^-$ , organic base) results in a reduction of external acidity and masks the  $\text{Na}^+/\text{H}^+$  exchange. The fact that amiloride inhibits both  $\text{Na}^+$  netflux and  $\text{H}^+$  netflux to the same extent confirms the presence of a  $\text{Na}^+/\text{H}^+$  exchange irrespective of preadaptation (Table 2). It is impossible to decide by titration of the external medium, however, whether the acidity resulting from  $\text{Na}^+$  absorption is due to  $\text{H}^+$  excretion or possibly to the absorption of  $\text{OH}^-$  ions along with the  $\text{Na}^+$  (cf. Garcia-Romeu & Ehrenfeld, unpublished data). A  $\text{Na}^+/\text{H}^+$  exchange has also been recorded in many ureotelic or ammonotelic animals (Stobbs, 1971; Garcia-Romeu *et al.* 1969; Garcia-Romeu & Ehrenfeld, 1972; Maetz, 1972). Kirschner, Greenwald & Kerstetter (1973) in a comparative study of three freshwater animals (frog, trout, crayfish) found evidence for  $\text{Na}^+/\text{H}^+$  exchange mechanisms. In our experiments we found a correlation between  $\text{Na}^+$  netflux and net  $\text{H}^+$  excretion whereas the above authors found a good correlation between  $\text{Na}^+$  influx and  $\text{H}^+$  netflux. This discrepancy between my results and those of Kirschner *et al.* may be due to the use of different methods for measuring the external acidity. It still remains a possibility that under our conditions the exchange is a  $\text{Na}^+$  influx/ $\text{H}^+$  efflux one. In this case, if the  $\text{Na}^+$  efflux were to be accompanied by an equivalent  $\text{HCO}_3^-$  efflux, part of the  $\text{H}^+$  efflux exchanged against the  $\text{Na}^+$  influx would be neutralised by the bicarbonate and the experimentally discernible process would be an apparent  $\text{Na}^+$  netflux/ $\text{H}^+$  netflux exchange. The fact that the  $\text{Na}^+$  and base effluxes are equal after addition of amiloride to the external medium would argue in favour of such a possibility (Table 2).

### Chloride transport

The absorption of  $\text{Cl}^-$  from a choline chloride solution implies that the chloride is exchanged against an endogenous ion of the same charge. Our data give a good correlation between net  $\text{Cl}^-$  absorption ( $F_n \text{Cl}^-$ ) and endogenous base excretion (Fig. 1); the slope of the regression line is not significantly different from 1, indicating a 1 for 1 exchange mechanism. Such a  $\text{Cl}^-$ /base exchange mechanism has been proposed for *Astacus pallipes* (Shaw, 1960), several species of frog (Krogh, 1937; Garcia-Romeu *et al.* 1969; Garcia-Romeu & Ehrenfeld, 1972) and an insect larva (Stobbs, 1971). Although no direct evidence was given by these workers as to the nature of

Endogenous base excreted it is probable that bicarbonate ions are involved. The present experimental technique, does not determine the nature of the excreted base. The alkalinisation of the external medium could also be the result of a simultaneous absorption of  $\text{Cl}^-$  and  $\text{H}^+$  although this is unlikely (Garcia-Romeu & Ehrenfeld unpublished data). The presence of a  $\text{Cl}^-/\text{HCO}_3^-$  exchange would seem to be the most probable explanation: the action of Diamox on the  $\text{Cl}^-$  transport argues in favour of this hypothesis (see below). The base excretion is 34 % higher than the net  $\text{Cl}^-$  absorption (Fig. 1: ordinate  $-17 \mu\text{-equiv./h/100 g}$  when abscissa is 0). A base excretion independent of net  $\text{Cl}^-$  absorption therefore exists; the nature of this titrable base remains to be determined as also that of the accompanying cation. The possibility of an excretion of  $\text{NaHCO}_3$  has already been considered: other cations such as potassium may accompany this endogenous base excretion. It is also possible that ammonia is in part responsible for the alkalinization of the external medium. If ammonia, as non-ionized  $\text{NH}_3$ , is excreted into a medium of pH 7.0, because of its pK of 9.3 it will act as a hydrogen ion trap and cause an alkalinization of the external medium.

### Action of Diamox

Our results show that Na and Cl ionic fluxes are inhibited by Diamox. These results obtained with *Astacus leptodactylus* agree with those from *R. esculenta* (Garcia-Romeu & Ehrenfeld, unpublished data). Diamox totally inhibits  $\text{Na}^+$  and  $\text{Cl}^-$  netfluxes and the excretory netfluxes of  $\text{H}^+$  and base linked with  $\text{Cl}^-$  transport. The inhibition, however, is not brought about in the same manner for the two ions. Thus the  $\text{Na}^+$  netflux inhibition is the result of a strong drop in  $\text{Na}^+$  influx, while the  $\text{Cl}^-$  netflux inhibition is due to a large increase in the  $\text{Cl}^-$  efflux, the influx not being inhibited (Tables 3 and 4B). This difference of reaction of the  $\text{Na}^+$  and  $\text{Cl}^-$  transport mechanisms to Diamox reveals the independence of the two mechanisms and poses the problem of the site of action of the inhibitor.

Maetz & Garcia-Romeu (1964) proposed the presence in the freshwater fish *Carassius auratus* of  $\text{Na}^+/\text{NH}_4^+$  and  $\text{Cl}^-/\text{HCO}_3^-$  exchange mechanisms dependent upon carbonic anhydrase. By inhibiting this enzyme Diamox would modify the cellular concentrations of hydrogen and bicarbonate and in this way block the ionic exchanges. The fact that  $\text{Cl}^-$  absorption in *C. auratus* is stimulated by the injection of bicarbonate argues in favour of this hypothesis. An important quantity of cellular carbonic anhydrase ( $2.17 \pm 0.23 \text{ U/mg}$ ,  $n = 12$ ) was found in the gills of *Astacus leptodactylus*. It would be reasonable to suppose therefore that in this species Diamox inhibits the transmembranous ionic fluxes by acting directly on the cellular carbonic anhydrase. This hypothesis may be questioned however, since there are other possible explanations of the action of Diamox on ionic transports. Thus an action has been reported in tissues which do not contain carbonic anhydrase (Kitahara, Fox & Hogben, 1967; Fuhrman, 1952; Istin *et al.* unpublished data) or under conditions in which an alternative hypothesis of the action is feasible (Hogben, 1967). The problem of the site of action of Diamox in our experiments remains unresolved.

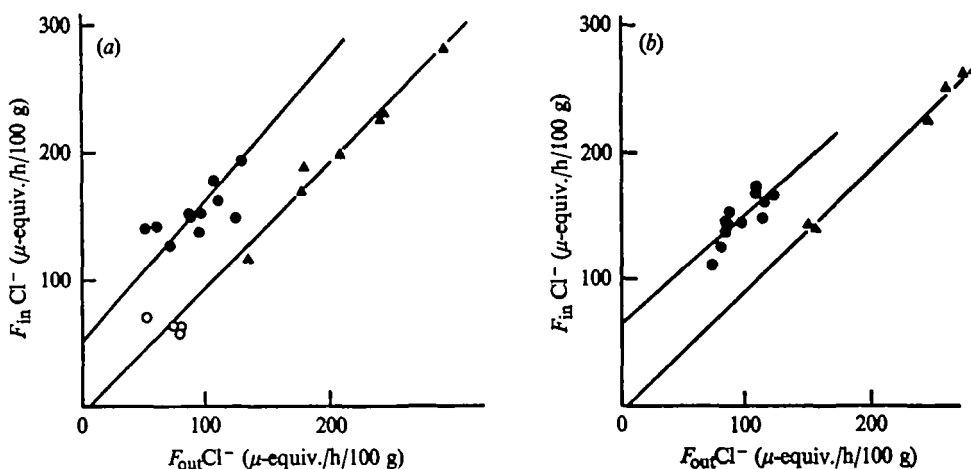

Fig. 4. Chloride efflux in relation to chloride influx in *Astacus leptodactylus*. Animals were pre-adapted in running water. (a) fluxes measured in a NaCl solution (1800  $\mu$ -equiv./l) buffered to pH 7.0. Each point represents an individual experiment of a control period (black dot) followed by either a 'Diamox period' (white dots) or a KCN period (cross). (b) fluxes are measured in a choline chloride solution (1800  $\mu$ -equiv./l) buffered to pH 7.0. Each point represents an individual experiment of a control period (black dot) followed by a 'diamox period' (white dot).

*Possibility of the occurrence of an exchange diffusion for chloride. Action of cyanide*

In the present experiments, with  $\text{Cl}^-$  transport from a 1800  $\mu$ -equiv./l NaCl solution the  $\text{Cl}^-$  efflux was 103  $\mu$ -equiv./h/100 g, and animals placed in distilled water had a chloride loss of a few  $\mu$ -equiv./h/100 g. Similar results were found by Shaw (1960) who suggested that a  $\text{Cl}^-/\text{Cl}^-$  exchange occurs in *Astacus pallipes* accounting for 90% of the influx. Fig. 4 illustrates the correlation between the  $\text{Cl}^-$  influxes and effluxes. This correlation can be explained by an exchange diffusion mechanism, linked to the active transport pump, which accounts for two-thirds of the chloride efflux when the external  $\text{Cl}^-$  concentration is 1800  $\mu$ -equiv. Garcia-Romeu & Ehrenfeld (1972) have recently reported a correlation between the influxes and effluxes of both  $\text{Cl}^-$  and  $\text{Na}^+$  but did not have sufficient data to advance an hypothesis concerning the nature of the linkage between influx and efflux.

Table 5 shows that the  $\text{Na}^+/\text{H}^+$  and  $\text{Cl}^-/\text{base}$  exchange mechanisms are inhibited by KCN and are thus dependent on metabolic energy. Part of the  $\text{Cl}^-$  influx, on the other hand, is not inhibited. This part has a value comparable to that of the  $\text{Cl}^-$  efflux, which is also unmodified by addition of inhibitor (Table 5, Fig. 4), and affords evidence in favour of the presence of an exchange diffusion. Exchange diffusion as defined by Ussing (1947) is independent of metabolic energy and the present  $\text{Cl}^-/\text{Cl}^-$  exchange satisfies that criterion. It has been shown that the chloride transported across the crayfish gill against an electrochemical gradient is by an active process (Shaw, 1960; Bielawsky, 1964, 1971; Croghan, Curra & Lockwood, 1965). This active chloride transport is brought about by exchange against an endogenous ion of the same charge and is responsible for the  $\text{Cl}^-$  netflux; since a large proportion of the chloride influx seems involved in a  $\text{Cl}^-/\text{Cl}^-$  exchange reaction, the question arises as to whether one is dealing with two different mechanisms, or one and the same.

Shaw (1960) concluded that when crayfish are  $\text{Cl}^-$  deficient 'a chloride-system activation is brought about. This system activation does not bring about an increase in chloride influx but serves to switch the mechanism from a predominantly  $\text{Cl}^-/\text{Cl}^-$  exchange to a useful exchange of chloride for some other anion.'

As can be seen from Table 3 and Fig. 4, the main action of Diamox is to increase the  $\text{Cl}^-$  efflux, the value of which becomes roughly equal to that of the influx. Thus the netflux becomes zero and the bicarbonate excretion linked to this flux is reduced proportionately. This gives the impression that the  $\text{Cl}^-/\text{HCO}_3^-$  exchange has become a  $\text{Cl}^-/\text{Cl}^-$  exchange as an effect of Diamox. Further investigation of the exact mode of action of Diamox is necessary to explain this possible shift of exchange systems and more work has to be done before confirming the existence of an exchange diffusion mechanism.

Our thanks are due to Dr R. Motais and Dr F. Garcia-Romeu for reading and criticizing the manuscript, to 'le Groupe de Biologie Marine du département de Biologie du Commissariat à l'Energie Atomique de Villefranche-sur-Mer' who made possible the ammonia concentration measurements, to Dr Istin for demonstrating the technique for measuring carbonic anhydrase and to Dr B. M. Walshe-Maetz for translating the manuscript.

#### REFERENCES

- ASSOUS, E., DREUX, C. & GIRARD, M. (1960). Application nouvelle de la dialyse à la détermination de l'ammoniémie. *Ann. Biol. Clin. Fr.* **18**, 319-30.
- BIELAWSKI, J. (1964). Chloride transport and water intake into isolated gills of crayfish. *Comp. Biochem. Physiol.* **13**, 423-32.
- BIELAWSKI, J. (1971). Energetics of ion transport in the gills of the crayfish *Astacus leptodactylus* Esch. *Comp. Biochem. Physiol.* **39B**, 649-57.
- BRAY, G. A. (1960). A simple efficient liquid scintillator for counting aqueous solutions in a liquid scintillation counter. *Analyt. Biochem.* **1**, 279-81.
- BRYAN, G. W. (1960b). Sodium regulation in the crayfish *Astacus fluviatilis*. II. Experiments with sodium-depleted animals. *J. exp. Biol.* **37**, 100-12.
- GROGHAN, P. C., CURRA, R. A. & LOCKWOOD, A. P. M. (1965). The electrical potential difference across the epithelium of isolated gills of the crayfish *Austropotamobius pallipes* lereboullet. *J. exp. Biol.* **42**, 463-74.
- DE VOOYS, G. G. N. (1968). Formation and excretion of ammonia in teleostei. I. Excretion of ammonia through the gills. *Archs. inst. Physiol. Biochim.* **76**, 268-73.
- FUHRMAN, F. A. (1952). Inhibition of active sodium transport in the isolated Frog skin. *Am. J. Physiol.* **171**, 266-78.
- GARCIA-ROMEY, F., SALIBIAN, A. & PEZZANI-HERNANDEZ, S. (1969). The nature of the *in vivo* sodium and chloride uptake mechanisms through the epithelium of the Chilean frog *Calyptocephalella gayi* (Dum et Bibr, 1841). *J. gen. Physiol.* **53**, 816-35.
- GARCIA-ROMEY, F., EHRENFELD, J. (1972). The role of ionic exchangers and pumps in transepithelial sodium and chloride transport across frog skin. In *Role of Membrane in Secretory Processes* (ed. L. Bolis, R. D. Keynes and W. Willibrandt), pp. 264-78. Amsterdam: North-Holland.
- HOGGEN, C. A. M. (1967). The chloride effect of carbonic anhydrase inhibitors. *Mol. Pharmacol.* **3**, 318.
- ISTIN, M. & GIRARD, J. P. (1970). Carbonic anhydrase and mobilisation of calcium reserves in the mantle of Lamellibranch. *Calc. Tiss. Res.* **5**, 247.
- KERSTETTER, T. H., KIRSCHNER, L. B. & RAFUSE, D. A. (1970). On the mechanism of sodium ion transport by the irrigated gills of rainbow trout (*Salmo gairdneri*). *J. gen. Physiol.* **56**, 342-59.
- KIRSCHNER, L. B., GREENWALD, L. & KERSTETTER, T. H. (1973). Effect of amiloride on sodium transport across body surfaces of freshwater animals. *Am. J. Physiol.* **224**, 832-7.

- KITAHARA, S. K. R., FOX, K. R. & HOGGEN, C. A. M. (1967). Depression of chloride transport by carbonic anhydrase inhibitors in the absence of carbonic anhydrase. *Nature, Lond.* **214**, 836-7.
- KOCH, H. J., EVANS, J. & SCHICKS, E. (1954). The active absorption of ions by the isolated gills of the crab *Eriocheir sinensis* (M. EDW). *Meded. vlaam. Acad. Kl. Wet.* **16**, 3-16.
- KROGH, A. (1937). Osmotic regulation in fresh water fishes by active absorption of chloride ions. *Z. vergl. Physiol.* **24**, 656-66.
- KROGH, A. (1939). *Osmotic Regulation in Aquatic Animals*. Cambridge University Press.
- LOGSDON, E. E. (1960). A method for the determination of ammonia in biological materials on the autoanalyser. *Ann. N.Y. Acad. Sci.* **87**, 801-7.
- MAETZ, J. (1956). Le dosage de l'anhydrase carbonique. Etude de quelques substances inhibitrices et activatrices. *Bull. Soc. Chim. biol.* **38**, 447.
- MAETZ, J. & GARCIA-ROMEU, F. (1964). The mechanism of sodium and chloride uptake by the gills of a fresh water fish, *Carassius auratus*. II. Evidence for  $\text{NH}_4^+/\text{Na}^+$  and  $\text{HCO}_3^-/\text{Cl}^-$  exchanges. *J. gen. Physiol.* **47**, 1209-27.
- MAETZ, J. (1972). Branchial sodium exchange and ammonia excretion in the goldfish *Carassius auratus*. Effects of ammonia loading and temperature changes. *J. exp. Biol.* **56**, 601-20.
- MAETZ, J. (1973).  $\text{Na}^+/\text{NH}_4^+$ ,  $\text{Na}^+/\text{H}^+$  exchanges and  $\text{NH}_3$  movement across the gill of *Carassius auratus*. *J. exp. Biol.* **58**, 255-75.
- MAREN, T. H. (1967). Carbonic anhydrase: chemistry, physiology and inhibition. *Physiol. Rev.* **47**, 595.
- SHAW, J. (1959). The absorption of sodium ions by the crayfish *Astacus pallipes* Lereboullet. I. The effect of external and internal sodium concentrations. *J. exp. Biol.* **36**, 136-44.
- SHAW, J. (1960). The absorption of chloride ions by the crayfish *Astacus pallipes* Lereboullet. *J. exp. Biol.* **37**, 557-72.
- SHAW, J. (1960a). The absorption of sodium ions by the crayfish *Astacus pallipes* Lereboullet. II. The effect of external anion. *J. exp. Biol.* **37**, 534-47.
- SHAW, J. (1960b). The absorption of sodium ions by the crayfish *Astacus pallipes* Lereboullet. III. The effect of other cations in the external solution. *J. exp. Biol.* **37**, 548-56.
- STOBART, R. H. (1971). Evidence for  $\text{Na}^+/\text{H}^+$  and  $\text{Cl}^-/\text{HCO}_3^-$  exchanges during independent sodium and chloride uptake by the larva of the mosquito *Aedes aegypti* (L.). *J. exp. Biol.* **54**, 19-27.
- USSING, H. H. (1947). Interpretation of the exchange of radiosodium in isolated muscle. *Nature*, **160**, 262-3.
